# Supplementary material for: Face liveness detection using dynamic texture
Source: Springer Nature journal article supplement (doi:10.1186/1687-5281-2014-2), 2014-01-07

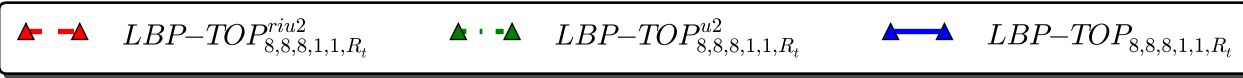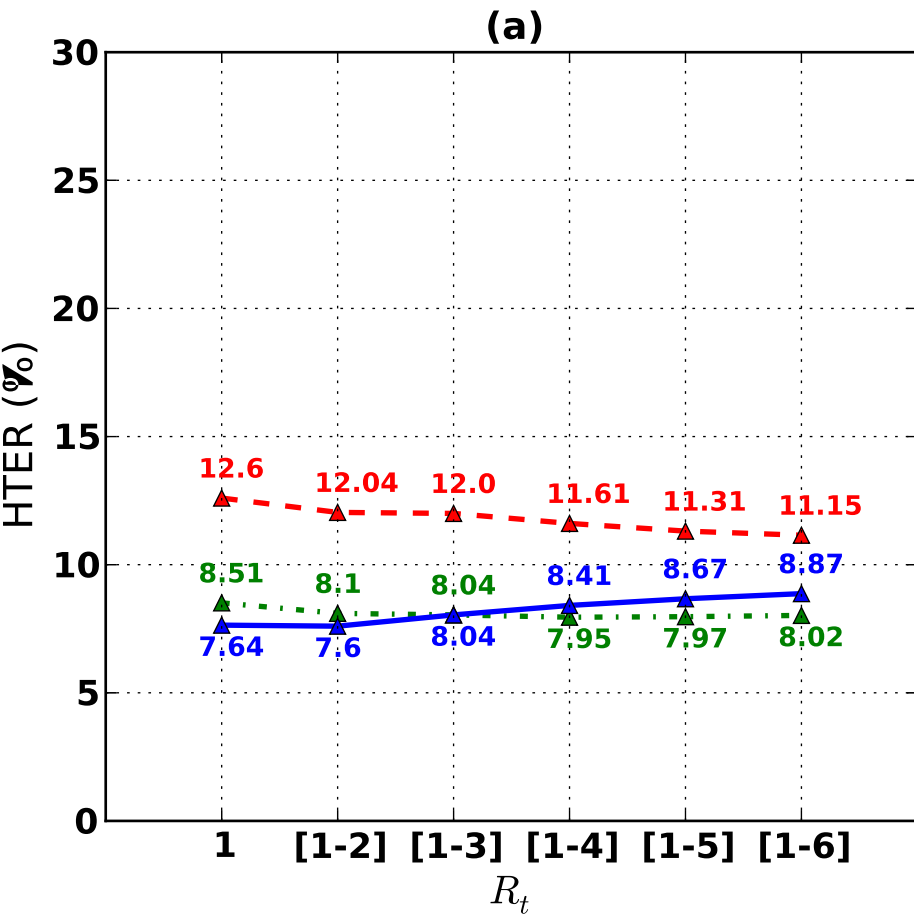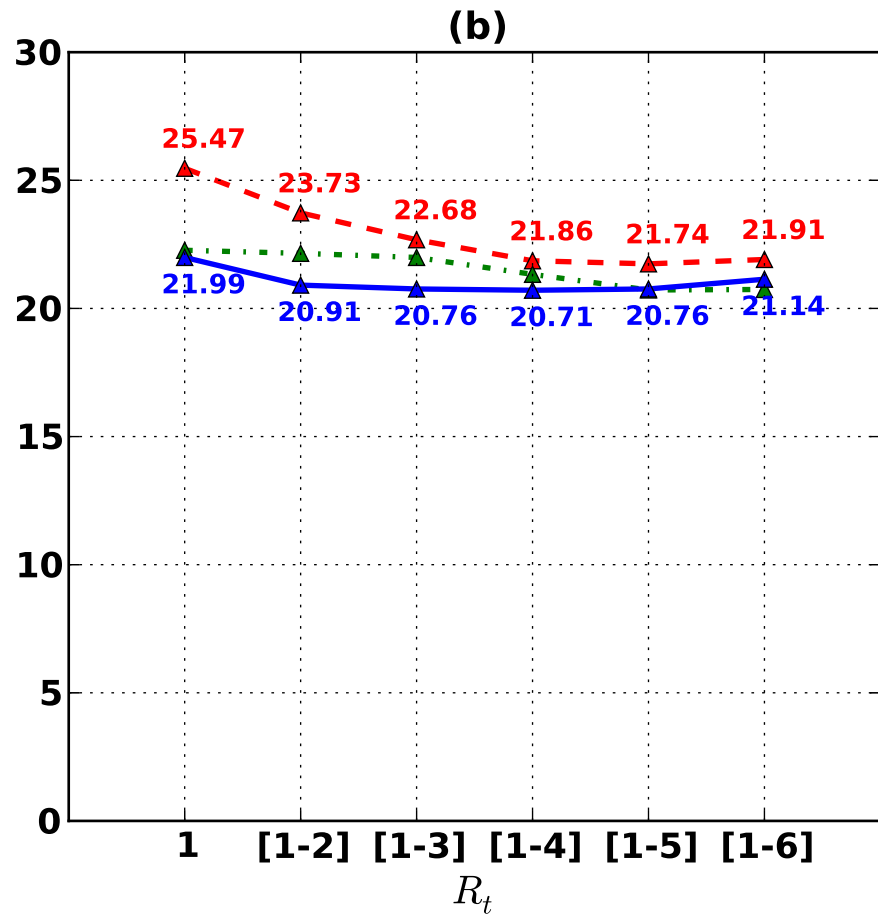

Supplement: 13640_2012_150_MOESM9_ESM.pdf [file 13640_2012_150_MOESM9_ESM.pdf]
