# Supplementary material for: Face liveness detection using dynamic texture
Source: Springer Nature journal article supplement (doi:10.1186/1687-5281-2014-2), 2014-01-07

**▲ -▲  $LBP-TOP_{8,8,8,1,1,1}^{u2}$  average of features**      **▲ ·-▲  $LBP-TOP_{8,8,8,1,1,1}^{u2}$  average of scores**

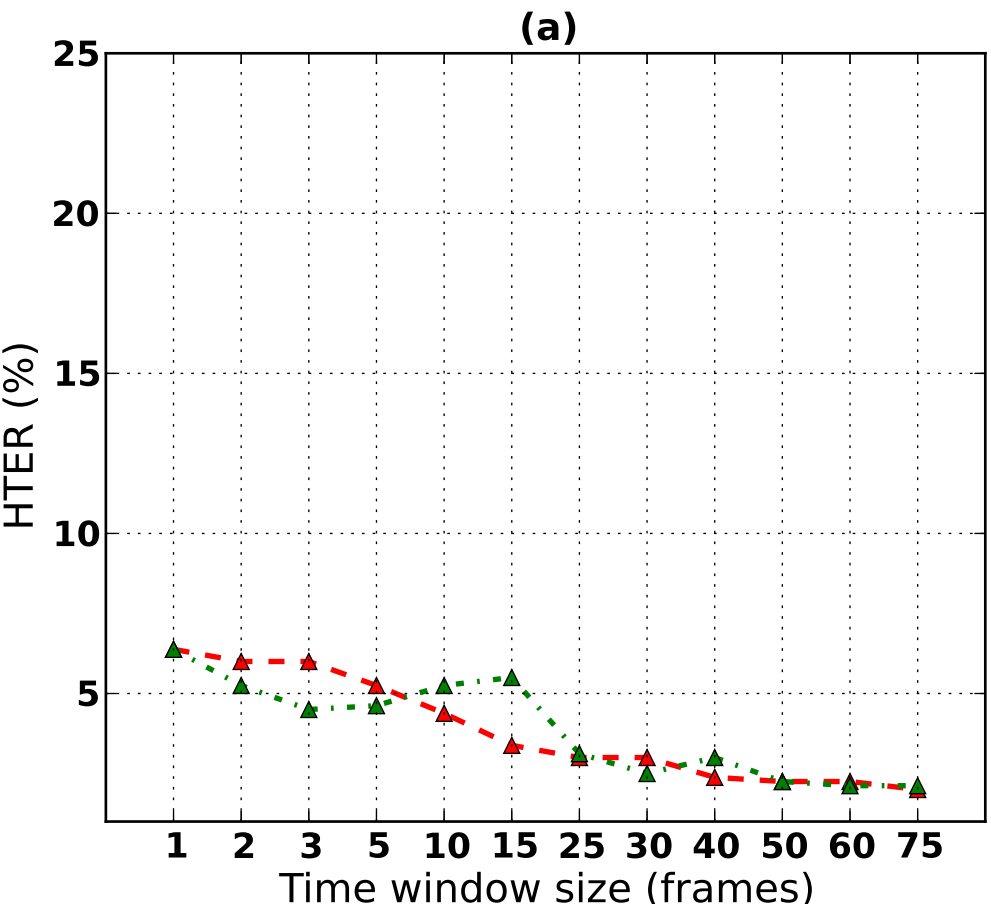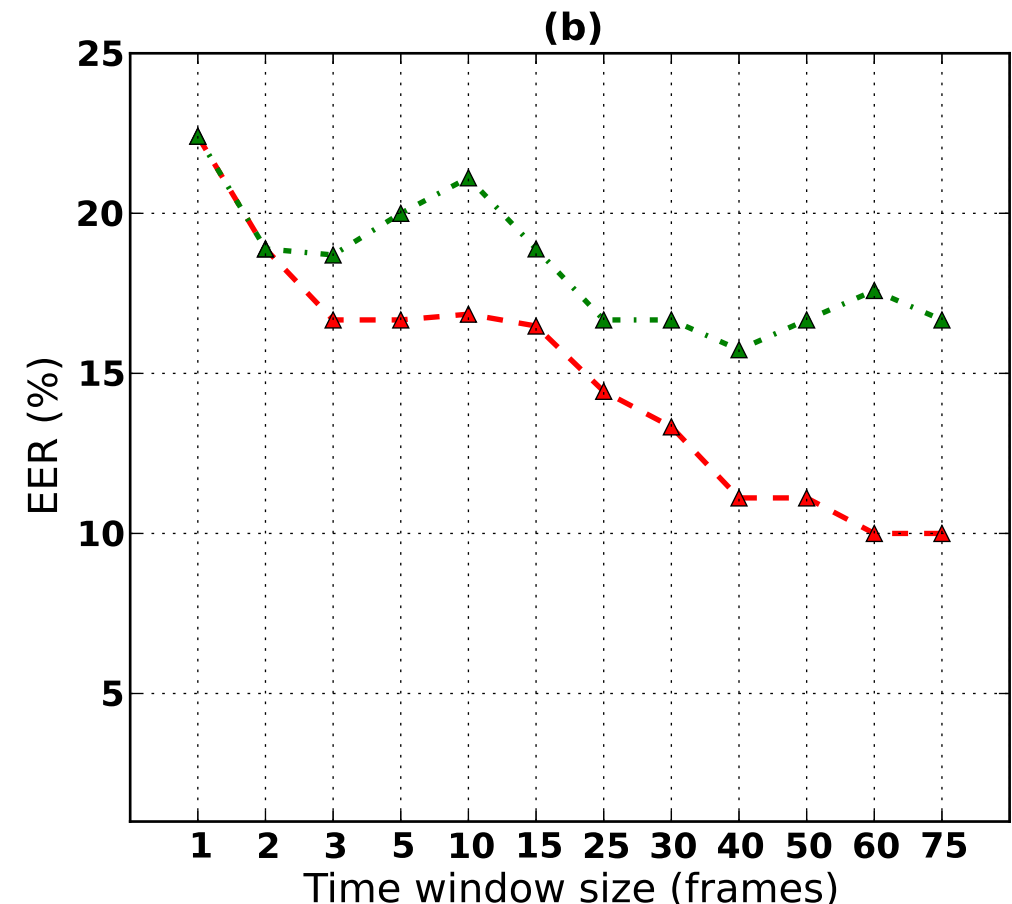

Supplement: 13640_2012_150_MOESM12_ESM.pdf [file 13640_2012_150_MOESM12_ESM.pdf]
